# Supplementary material
Source: PubMed Central journal article supplement (PMC3250226)

## Supplemental Material: Time crawls: The temporal resolution of infant visual attention

Farzin, Rivera, Whitney

Figure S1. (a) A schematic representation of the stimulus used in Experiment 2. Gabors were a single luminance-defined sinusoid (0.2 cycles/deg) that flickered in counterphase at 10 Hz (b) Mean log contrast sensitivity (+ SEM) by age group. The results show that infants are capable of perceiving flicker at 10Hz.

Figure S1a

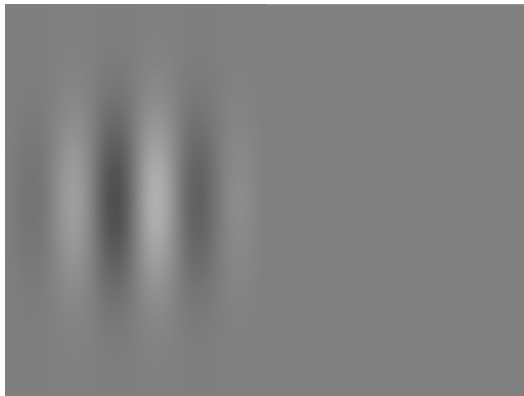

Figure S1b

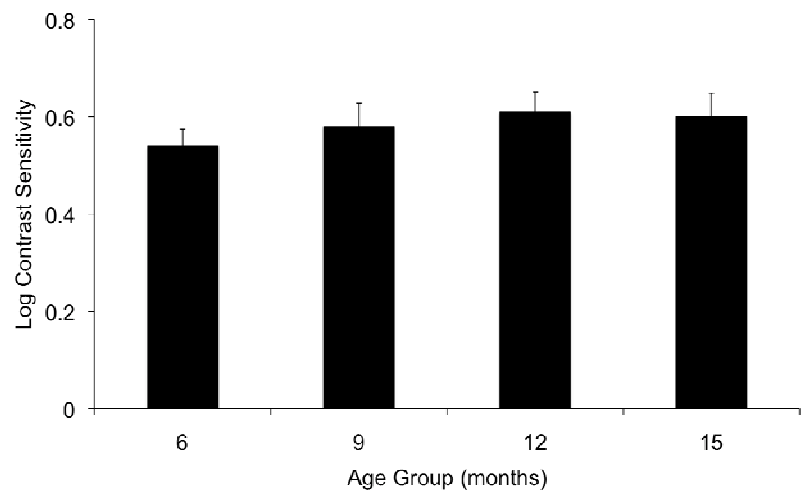

Supplement: NIHMS343965-supplement.pdf [file NIHMS343965-supplement.pdf]
